# Supplementary material for: Facile fabrication of hydrogel coated membrane for controllable and selective oil-in-water emulsion separation
Source: Royal Society of Chemistry journal article supplement (doi:10.1039/c8sm00139a), 2018-01-01
Supplement: c8sm00139a1.pdf [file c8sm00139a1.pdf]

## Supporting Information

# Facile fabrication of hydrogel coated membrane for controllable and selective oil-in-water emulsion separation

Qingdong Zhang <sup>a</sup>, Na Liu <sup>b</sup>, Yen Wei <sup>a</sup> and Lin Feng <sup>a\*</sup>

*a* Department of Chemistry, Tsinghua University, Beijing, 100084, P. R. China

*b* Institute of Materials for Energy and Environment, School of Materials Science and Engineering, Qingdao University, Qingdao 266071, P. R. China

*E-mail: fl@mail.tsinghua.edu.cn*

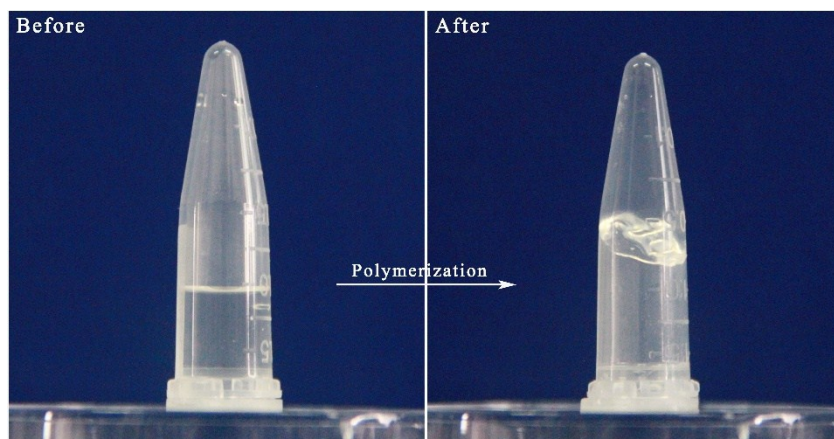

**Figure S1** Digital photos of the pregel solution in the bulletlike centrifuge tube and the obtained hydrogel after polymerization.

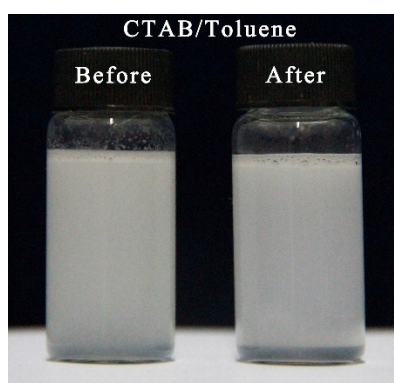

**Figure S2** Photographs of the CTAB-stabilized toluene-in-water emulsion before and after filtration.

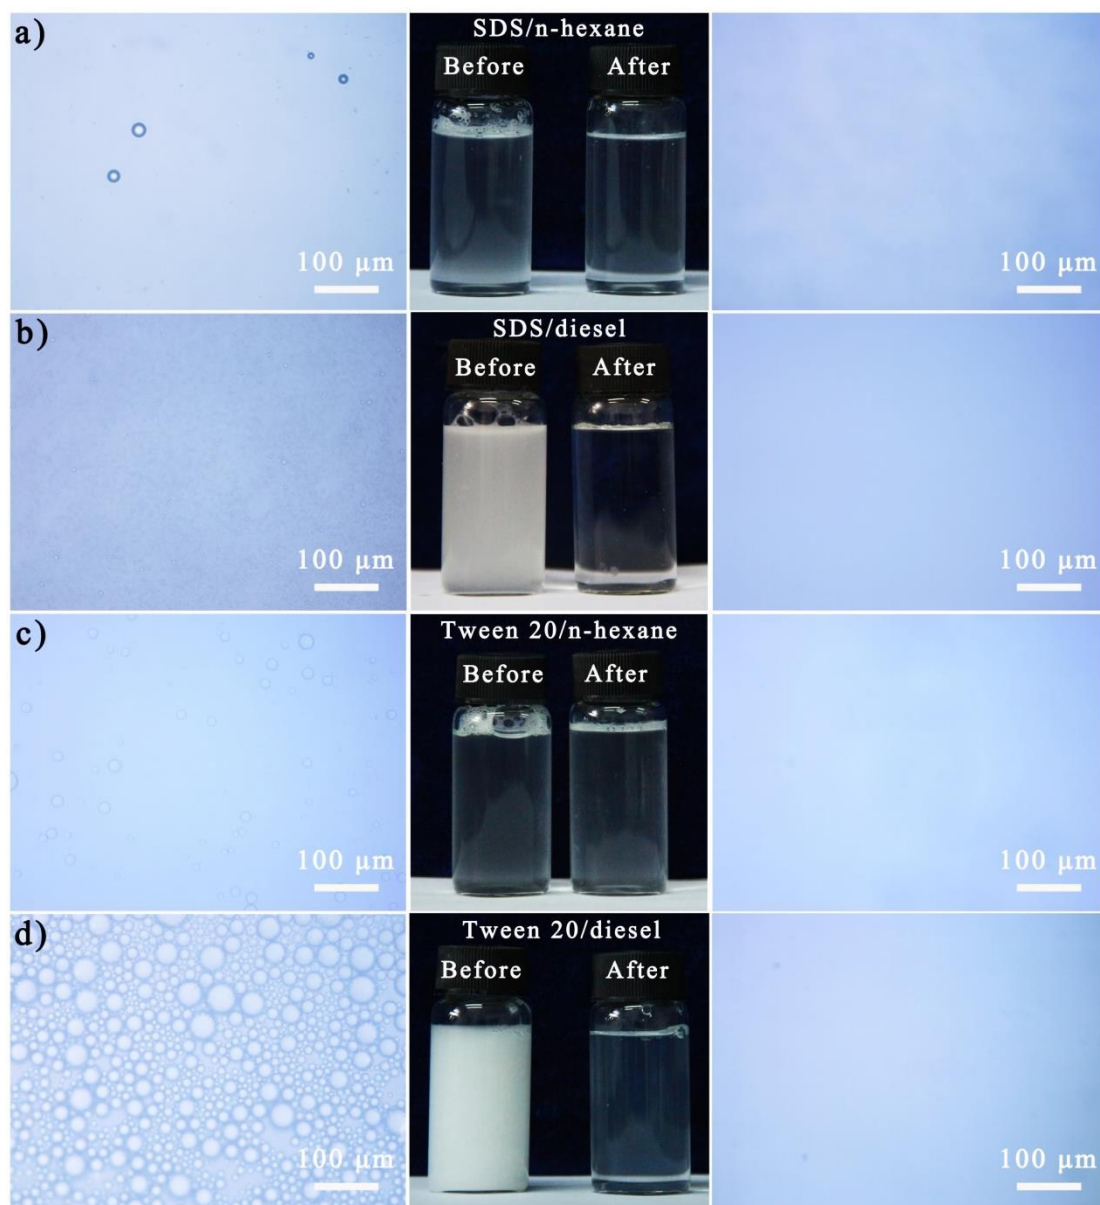

**Figure S3** Photographs of n-hexane/diesel-in-water emulsions stabilized with SDS and Tween 20 before and after filtration.

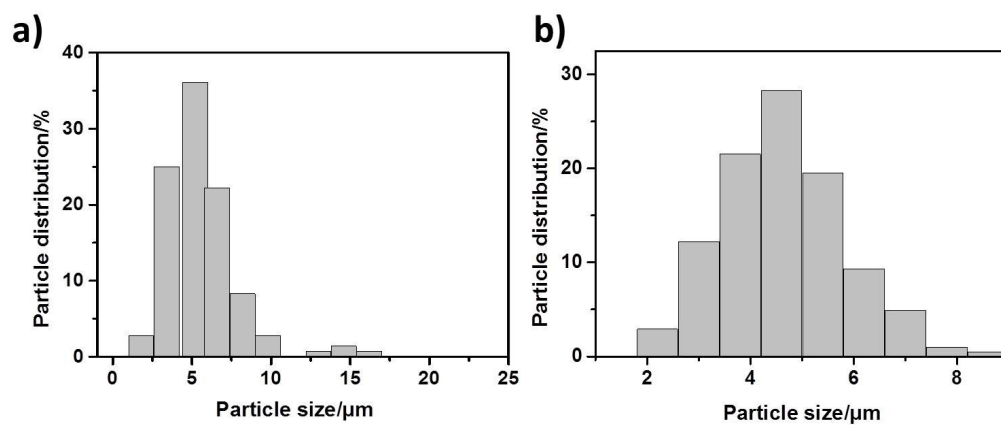

**Figure S4** The particle size distribution of a) SDS-stabilized toluene-in-water emulsions; b) Tween20-stabilized toluene-in-water emulsions.

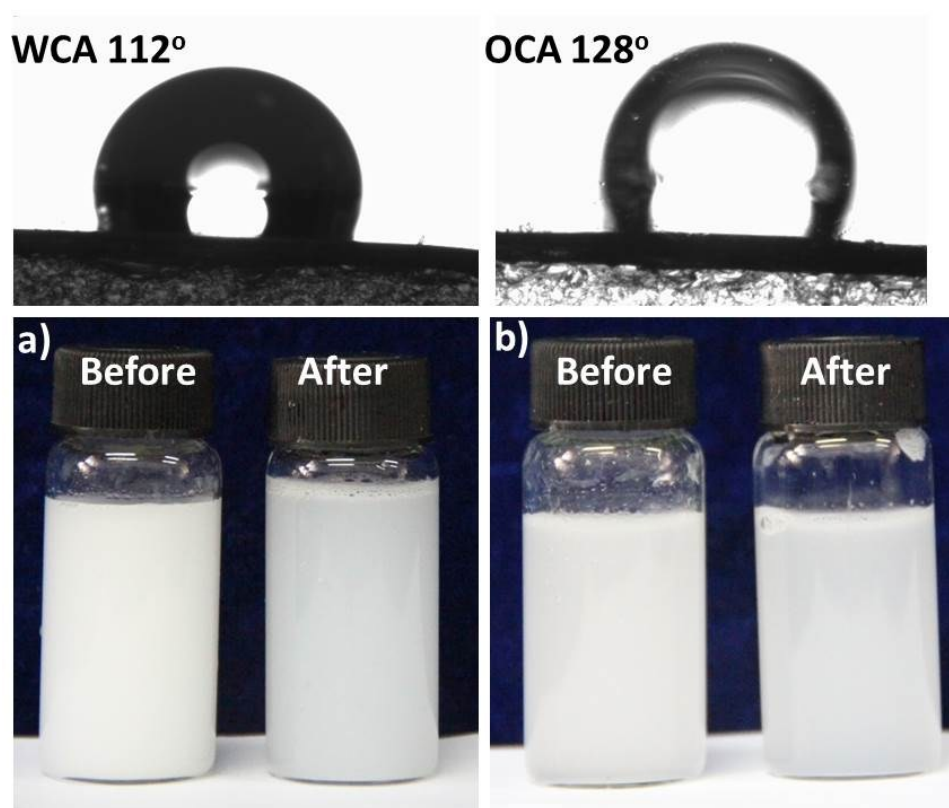

**Figure S5** The water and oil contact angle of the initial MCE membrane and the separation results by the initial MCE membrane. a) photographs of Tween 20-stabilized toluene-in-water emulsions before and after filtration by the initial MCE membrane; b) photographs of SDS-stabilized toluene-in-water emulsions before and after filtration by the initial MCE membrane.

| a)                | 1 (ppm) | 2 (ppm) | 3 (ppm) |
|-------------------|---------|---------|---------|
| SDS/Toluene       | 50.841  | 49.89   | 48.895  |
| Tween 20/Toluene  | 46.408  | 50.72   | 50.261  |
| SDS/n-Hexane      | 52.424  | 50.854  | 50.284  |
| Tween 20/n-Hexane | 51.539  | 52.3    | 51.54   |
| SDS /Diesel       | 11.26   | 11.248  | 11.236  |
| Tween 20/Diesel   | 12.523  | 12.028  | 11.032  |

| b) | 1 (ppm) | 10 (ppm) | 20 (ppm) | 30 (ppm) |
|----|---------|----------|----------|----------|
|----|---------|----------|----------|----------|

---

|                    |        |        |       |        |
|--------------------|--------|--------|-------|--------|
| <b>SDS/Toluene</b> | 50.903 | 52.623 | 50.12 | 48.239 |
|--------------------|--------|--------|-------|--------|

---

**Figure S6** The oil content in collected filtrates measured by the infrared spectrometer oil content analyzer. a) The oil content in the collected filtrates in the emulsion separation experiments for toluene-in-water, n-hexane-in-water and diesel-in-water emulsions stabilized with different surfactants. a) The oil content in the collected filtrates in recyclability tests of the PAMPS hydrogel coated membrane for repeated SDS-stabilized toluene-in-water emulsion separation.

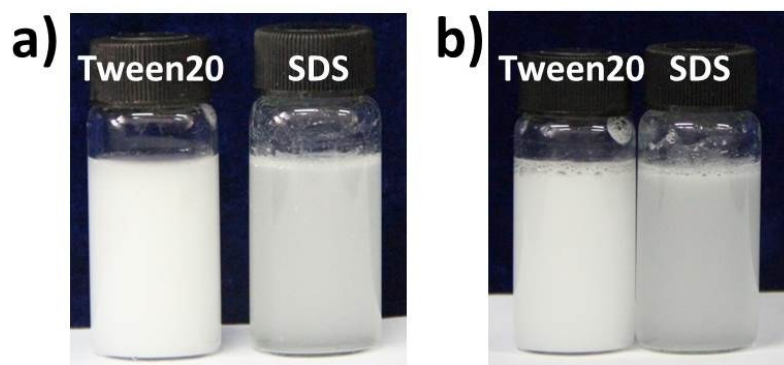

**Figure S7** The stability test of Tween 20/SDS-stabilized toluene-in-water emulsions. a) the prepared fresh Tween 20/SDS-stabilized toluene-in-water emulsions; b) the emulsions after placement for 48 h.

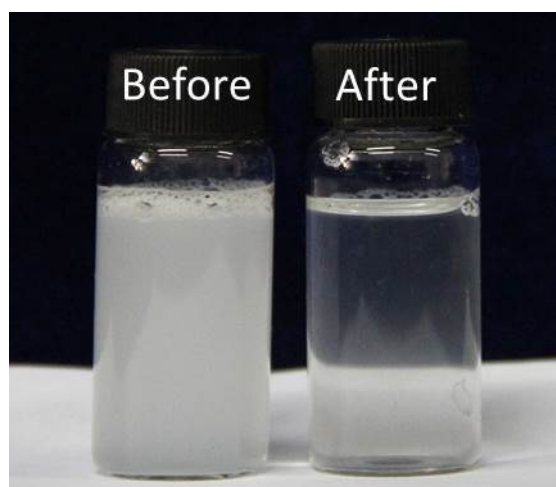

**Figure S8** Photographs of the SDS-stabilized toluene-in-water emulsion before and after filtration.
